# Supplementary material for: Effect of quercetin on doxorubicin cytotoxicity in sensitive and resistant human MCF7 breast cancer cell lines
Source: PubMed Central journal article supplement — Biomed Rep. 2024 Feb 5;20(4):58. doi: 10.3892/br.2024.1745 (PMC10895388; doi:10.3892/br.2024.1745), 2024-02-05
Supplement: Supplementary_Data.pdf [file Supplementary_Data.pdf]

**Table SI.** Upregulated genes in DOX resistant cells (MCF-7/DOX53.2nM) treated with 5  $\mu$ M DOX [Track (1)].

| Gene descriptions                                                                             | Gene symbol | Fold of regulation | Gene function                           |
|-----------------------------------------------------------------------------------------------|-------------|--------------------|-----------------------------------------|
| Interleukin 6                                                                                 | IL6         | 1305.2             | Regulation of apoptosis                 |
| Slit homolog 2 (Drosophila)                                                                   | SLIT2       | 388.02             | Cell migration process                  |
| Cadherin 13, H-cadherin (heart)                                                               | CDH13       | 218.27             | Membrane receptor                       |
| Serpin peptidase inhibitor, clade E (nexin, plasminogen activator inhibitor type 1), member 1 | SERPINE1    | 127.12             | Regulation of cell proliferation        |
| Hypermethylated in cancer 1                                                                   | HIC1        | 91.77              | Regulation of transcription             |
| Cyclin A1                                                                                     | CCNA1       | 54.57              | activating subunits of enzymatic        |
| Retinoic acid receptor, beta                                                                  | RARB        | 45.25              | Intracellular cascade                   |
| Plasminogen activator, urokinase                                                              | PLAU        | 44.32              | Regulation of cell proliferation        |
| ADAM metallopeptidase domain 23                                                               | ADAM23      | 41.93              | membrane-anchored proteins              |
| Colony stimulating factor 1 (macrophage)                                                      | CSF1        | 35.26              | Regulation of cell proliferation        |
| Snail homolog 2 (Drosophila)                                                                  | SNAI2       | 30.06              | Regulation of transcription             |
| Adenomatous polyposis coli                                                                    | APC         | 25.63              | Regulation of cell proliferation        |
| Prostaglandin-endoperoxide synthase 2 (prostaglandin G/H synthase and cyclooxygenase)         | PTGS2       | 17.03              | Regulation of transcription             |
| Glutathione S-transferase pi 1                                                                | GSTP1       | 10.85              | detoxification                          |
| Cyclin-dependent kinase inhibitor 1C (p57, Kip2)                                              | CDKN1C      | 9.58               | Regulation of cell cycle                |
| Estrogen receptor 2 ER beta                                                                   | ESR2        | 9.45               | Anti- apoptosis                         |
| Keratin 5                                                                                     | KRT5        | 7.26               | Regulation of cell proliferation        |
| Stratifin                                                                                     | SFN         | 6.92               |                                         |
| Cyclin-dependent kinase inhibitor 1A (p21, Cip1)                                              | CDKN1A      | 6.11               | Regulation of cell cycle                |
| Jun proto-oncogene                                                                            | JUN         | 5.54               | Regulation of apoptosis                 |
| Nuclear receptor subfamily 3, group C, member 1 (glucocorticoid receptor)                     | NR3C1       | 5.5                | Regulation of transcription             |
| Matrix metallopeptidase 2 (gelatinase A, 72kDa gelatinase, 72kDa type IV collagenase)         | MMP2        | 5.21               | degradation of the extracellular matrix |
| Secreted frizzled-related protein 1                                                           | SFRP1       | 5.21               | extracellular signaling ligands         |
| Insulin-like growth factor 1 (somatomedin C)                                                  | IGF1        | 5.21               | Intracellular signaling cascade         |
| Cyclin-dependent kinase inhibitor 2A (melanoma, p16, inhibits CDK4)                           | CDKN2A      | 5.21               | Regulation of cell cycle                |
| Phosphatase and tensin homolog                                                                | PTEN        | 4.99               | catalysis the dephosphorylation         |
| ATP-binding cassette, sub-family G (WHITE), member 2                                          | ABCG2       | 4.92               | Transmembrane transport                 |
| GLI family zinc finger 1                                                                      | GLI1        | 4.2                | Regulation of transcription             |
| Cadherin 1, type 1, E-cadherin (epithelial)                                                   | CDH1        | 4                  | Regulation of cell proliferation        |
| Cadherin 1, type 1, E-cadherin (epithelial)                                                   | MAPK8       | 3.71               | Regulation of transcription             |

|                                                         |        |      |                                  |
|---------------------------------------------------------|--------|------|----------------------------------|
| Non-metastatic cells 1                                  | NME1   | 3.58 | Regulation of transcription      |
| Twist homolog 1 (Drosophila)                            | TWIST1 | 3.41 | Regulation of transcription      |
| Cystatin E/M                                            | CST6   | 3.03 | Regulation of transcription      |
| Cyclin E1                                               | CCNE1  | 3.03 | Regulation of cell cycle         |
| Cyclin D2                                               | CCND2  | 2.97 | Regulation of cell cycle         |
| Notch 1                                                 | NOTCH1 | 2.87 | Signaling pathway                |
| PR domain containing 2, with<br>ZNF domain              | PRDM2  | 2.31 | Regulation of transcription      |
| B-cell CLL/lymphoma 2                                   | BCL2   | 2.3  | Negative regulation of apoptosis |
| Catenin (cadherin-associated<br>protein), beta 1, 88kDa | CTNNB1 | 2.25 | Regulation of transcription      |
| Vascular endothelial growth<br>factor A                 | VEGFA  | 2.17 | Regulation of apoptosis          |
| Transforming growth factor,<br>beta 1                   | TGFB1  | 2    | Cell cycle checkpoint            |

---

DOX, doxorubicin.

**Table SII.** Downregulated genes in DOX resistant cells (MCF-7/DOX53.2nM) treated with 5  $\mu$ M DOX [Track (1)].

| Gene descriptions                               | Gene symbol | Fold of regulation | Gene function                              |
|-------------------------------------------------|-------------|--------------------|--------------------------------------------|
| Baculoviral IAP repeat containing 5             | BIRC5       | -51.27             | Regulation of apoptosis                    |
| Antigen identified by monoclonal antibody Ki-67 | MKI67       | -22.78             | Regulation of cell proliferation           |
| Breast cancer 1, early onset                    | BRCA1       | -9.45              | DNA damage response                        |
| X-box binding protein 1                         | XBP1        | -6.54              | Regulation of transcription                |
| Progesterone receptor                           | PGR         | -5.39              | Regulation of transcription                |
| Breast cancer 2, early onset                    | BRCA2       | -3.94              | DNA damage response                        |
| Mucin 1, cell surface associated                | MUC1        | -3.56              | Response of extracellular stimulus         |
| Estrogen receptor 1                             | ESR1        | -2.6               | Regulation of transcription DNA- dependent |
| Retinoblastoma 1                                | RB1         | -2.14              | Inhibiting cell cycle progression          |
| Androgen receptor                               | AR          | -2.14              | -                                          |
| Mitogen-activated protein kinase 3              | MAPK3       | -2.01              | Control of cell proliferation              |

DOX, doxorubicin.

**Table SIII.** Upregulated genes in DOX resistant cells (MCF-7/DOX53.2nM) treated with combination of 5  $\mu$ M DOX with 20  $\mu$ M quercetin [Track(2)].

| Gene descriptions                                                                             | Gene symbol | Fold of regulation | Gene function                                             |
|-----------------------------------------------------------------------------------------------|-------------|--------------------|-----------------------------------------------------------|
| Interleukin 6                                                                                 | IL6         | 1636.1             | Regulation of apoptosis                                   |
| Serpin peptidase inhibitor, clade E (nexin, plasminogen activator inhibitor type 1), member 1 | SERPINE1    | 167.27             | Regulation of cell proliferation                          |
| Slit homolog 2 (Drosophila)                                                                   | SLIT2       | 151.8              | Transmembrane and signaling protein                       |
| Matrix metalloproteinase 2 (gelatinase A, 72kDa gelatinase, 72kDa type IV collagenase)        | MMP2        | 84.21              | Degradation of the extracellular matrix                   |
| Hypermethylated in cancer 1                                                                   | HIC1        | 62.51              | Regulation of transcription                               |
| Cyclin-dependent kinase inhibitor 1A (p21, Cip1)                                              | CCNA1       | 55.56              | Regulation of cell cycle                                  |
| ADAM metalloproteinase domain 23                                                              | ADAM23      | 39.02              | Regulation of cell cycle                                  |
| Cadherin 13, H-cadherin (heart)                                                               | CDH13       | 30.4               | Membrane receptor                                         |
| Glutathione S-transferase pi 1                                                                | GSTP1       | 22.41              | Metabolic process                                         |
| Cyclin D1                                                                                     | CCND2       | 22.25              | Regulation of cell cycle                                  |
| Colony stimulating factor 1 (macrophage)                                                      | CSF1        | 17.58              | Regulation of cell proliferation                          |
| Cyclin-dependent kinase inhibitor 2A (melanoma, p16, inhibits CDK4)                           | CDKN2A      | 13.7               | Regulation of cell cycle                                  |
| Insulin-like growth factor 1 (somatomedin C)                                                  | IGF1        | 13.7               | Regulation of DNA replication                             |
| Secreted frizzled-related protein 1                                                           | SFRP1       | 13.7               | extracellular signaling ligands                           |
| Retinoic acid receptor, beta                                                                  | RARB        | 13.7               |                                                           |
| Plasminogen activator, urokinase                                                              | PLAU        | 13.7               | Regulation of cell proliferation                          |
| Keratin 5                                                                                     | KRT5        | 13.6               | Regulation of cell proliferation                          |
| Adenomatous polyposis coli                                                                    | APC         | 10.53              | Control cell division                                     |
| Cyclin-dependent kinase inhibitor 1C (p57, Kip2)                                              | CDKN1C      | 8.73               | Regulation of cell cycle                                  |
| ATP-binding cassette, sub-family G (WHITE), member 2                                          | ABCG2       | 8.26               | Transmembrane transport                                   |
| GLI family zinc finger 1                                                                      | GLI1        | 7.76               | Regulation of DNA replication                             |
| Cystatin E/M                                                                                  | CST6        | 7.29               | Regulate mitotic cell cycle                               |
| B-cell CLL/lymphoma 2                                                                         | BCL2        | 6.22               | Negative regulation of apoptosis                          |
| Cyclin-dependent kinase inhibitor 1A (p21, Cip1)                                              | CDKN1A      | 6.22               | Regulation of cell cycle                                  |
| Nuclear receptor subfamily 3, group C, member 1 (glucocorticoid receptor)                     | NR3C1       | 5.84               | Regulation of cell proliferation                          |
| Jun proto-oncogene                                                                            | JUN         | 5.01               | Regulation of cell proliferation                          |
| Stratifin                                                                                     | SFN         | 4.65               | Regulation of cell cycle                                  |
| Ataxia telangiectasia mutated                                                                 | ATM         | 4.02               | Induction of apoptosis                                    |
| Non-metastatic cells 1                                                                        | NME1        | 3.8                | Regulate mitotic cell cycle                               |
| Phosphatase and tensin homolog                                                                | PTEN        | 3.15               | regulate cell division                                    |
| PR domain containing 2, with ZNF domain                                                       | PRDM2       | 2.94               | Regulation of transcription                               |
| Cadherin 1, type 1, E-cadherin (epithelial)                                                   | CDH1        | 2.71               | Making a protein called epithelial cadherin or E-cadherin |
| Prostaglandin-endoperoxide synthase 2 (prostaglandin G/H synthase and cyclooxygenase)         | PTGS2       | 2.61               | Regulation of transcription                               |

|                                  |       |      |                                  |
|----------------------------------|-------|------|----------------------------------|
| Cyclin E1                        | CCNE1 | 2.49 | Transition of mitotic cell cycle |
| Mitogen-activated protein kinase | MAPK8 | 2.06 | Regulation of cell proliferation |

---

8  
DOX, doxorubicin.

**Table SIV.** Downregulated genes in DOX resistant cells (MCF-7/DOX53.2nM) treated with combination of 5  $\mu$ M DOX with 20  $\mu$ M quercetin [Track(2)].

| Gene descriptions                               | Gene symbol | Fold of regulation | Gene function                              |
|-------------------------------------------------|-------------|--------------------|--------------------------------------------|
| Baculoviral IAP repeat containing 5             | BIRC5       | -19.48             | Regulation of apoptosis                    |
| Antigen identified by monoclonal antibody Ki-67 | MKI67       | -10.3              | Regulation of cell proliferation           |
| Progesterone receptor                           | PGR         | -4.07              | Regulation of transcription                |
| Breast cancer 2, early onset                    | BRCA2       | -4.04              | DNA damage response                        |
| X-box binding protein 1                         | XBP1        | -4.01              | Regulation of transcription                |
| Mucin 1, cell surface associated                | MUC1        | -2.86              | Response of extracellular stimulus         |
| Breast cancer 1, early onset                    | BRCA1       | -2.65              | DNA damage response                        |
| Estrogen receptor 1                             | ESR1        | -2.32              | Regulation of transcription DNA- dependent |
| Cyclin-dependent kinase 2                       | CDK2        | -2.29              | Regulation of cell cycle                   |
| Epidermal growth factor                         | EGF         | -2.23              | Regulation of cell proliferation           |
| Tumor protein p73                               | TP73        | -2.18              | Regulation of cell cycle                   |

DOX, doxorubicin.

**Table SV.** Upregulated genes in the difference between Track(1) and Track (2).

| Gene descriptions                                                                                                                                                                          | Gene symbol | Difference of<br>Fold of<br>regulation | Gene function                           |
|--------------------------------------------------------------------------------------------------------------------------------------------------------------------------------------------|-------------|----------------------------------------|-----------------------------------------|
| Interleukin 6                                                                                                                                                                              | IL6         | 330.9                                  | Regulation of apoptosis                 |
| Matrix metalloproteinase 2<br>(gelatinase A, 72kDa<br>gelatinase, 72kDa type IV<br>Serpine peptidase inhibitor,<br>clade E (nexin,<br>plasminogen activator<br>inhibitor type 1), member 1 | MMP2        | 79                                     | Degradation of the extracellular matrix |
| Baculoviral IAP repeat<br>containing 5                                                                                                                                                     | SERPINE1    | 40.15                                  | Regulation of cell proliferation        |
| Cyclin D2                                                                                                                                                                                  | BIRC5       | 31.79                                  | Regulation of apoptosis                 |
| Antigen identified by<br>monoclonal antibody Ki-67                                                                                                                                         | CCND2       | 19.28                                  | Regulation of cell cycle                |
| Glutathione S-transferase<br>pi 1                                                                                                                                                          | MKI67       | 12.48                                  | Regulation of cell proliferation        |
| Secreted frizzled-related<br>protein 1                                                                                                                                                     | GSTP1       | 11.56                                  | Metabolic process                       |
| Insulin-like growth factor 1<br>(somatomedin C)                                                                                                                                            | SFRP1       | 8.49                                   | Regulation of cell proliferation        |
| Cyclin-dependent kinase<br>inhibitor 2A (melanoma,<br>p16, inhibits CDK4)                                                                                                                  | IGF1        | 8.49                                   | Intracellular signaling cascade         |
| Breast cancer 1, early onset                                                                                                                                                               | CDKN2A      | 8.49                                   | Regulation of cycle                     |
| Keratin 5                                                                                                                                                                                  | BRCA1       | 6.8                                    | DNA damage response                     |
| Ataxia telangiectasia<br>mutated                                                                                                                                                           | KRT5        | 6.34                                   | Regulation of cell proliferation        |
|                                                                                                                                                                                            | ATM         | 5.08                                   | Induction of apoptosis                  |

**Table SVI.** Downregulated genes in the difference between Track (1) and Track (2).

| Gene descriptions                                                                     | Gene symbol | Difference of Fold of regulation | Gene function                    |
|---------------------------------------------------------------------------------------|-------------|----------------------------------|----------------------------------|
| Slit homolog 2 (Drosophila)                                                           | SLIT2       | -236.22                          | Regulation of cell proliferation |
| Cadherin 13, H-cadherin (heart)                                                       | CDH13       | -187.87                          | Membrane receptor                |
| Retinoicacidreceptor, beta                                                            | RARB        | -31.55                           | regulating gene expression       |
| Snailhomolog 2 (Drosophila)                                                           | SNAI2       | -31.23                           | Regulation of transcription      |
| Plasminogenactivator, urokinase                                                       | PLAU        | -30.62                           | Regulation of cell proliferation |
| Hypermethylated in cancer 1                                                           | HIC1        | -29.26                           | Regulation of transcription      |
| Colony stimulating factor 1 (macrophage)                                              | CSF1        | -17.68                           | Regulation of cell proliferation |
| Adenomatouspolyposis coli                                                             | APC         | -15.1                            | Regulation of cell proliferation |
| Prostaglandin-endoperoxide synthase 2 (prostaglandin G/H synthase and cyclooxygenase) | PTGS2       | -14.42                           | Regulation of transcription      |
| Estrogen receptor 2 ER beta                                                           | ESR2        | -11                              | Anti-apoptosis                   |
